# Supplementary material for: Cancer Associated Aberrant Protein O-Glycosylation Can Modify Antigen Processing and Immune Response
Source: PubMed Central journal article supplement (PMC3506546; doi:10.1371/journal.pone.0050139), 2012-11-26

Figure S1, Madsen *et al.*

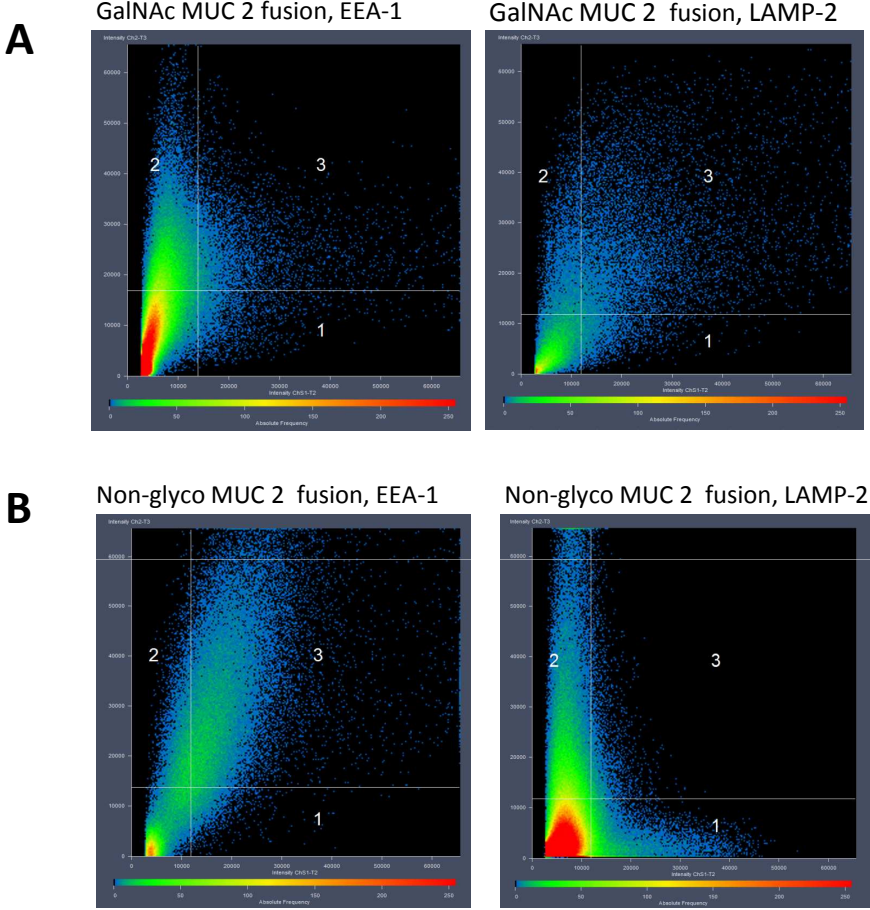

Supplement: pone.0050139.s001.pdf [file pone.0050139.s001.pdf]
